# Supplementary figures and images for: Circulating Tumor Cell–Based Molecular Classifier for Predicting Resistance to Abiraterone and Enzalutamide in Metastatic Castration-Resistant Prostate Cancer
Source: PubMed Central journal article supplement — Neoplasia. 2019 Jul 2;21(8):802–9. doi: 10.1016/j.neo.2019.06.002 (PMC6612010; doi:10.1016/j.neo.2019.06.002), 2019-07-02

ACTB

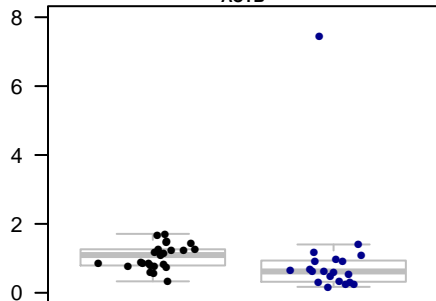

TUBA1B

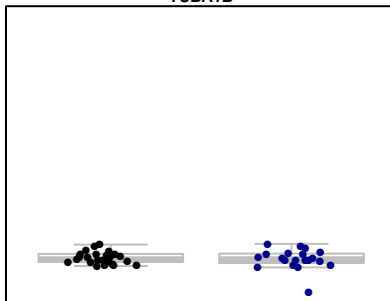

HMBS

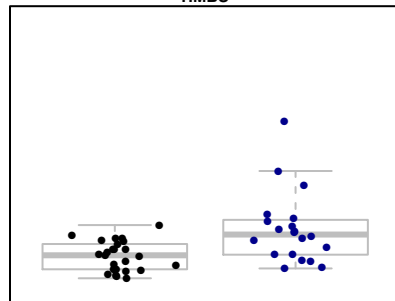

CD326

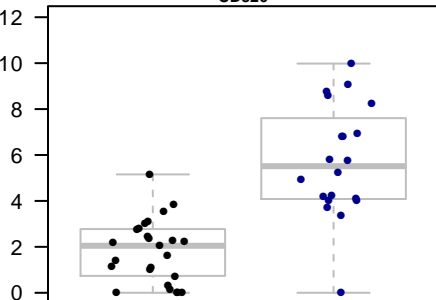

CDH1

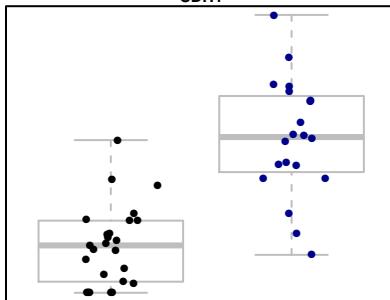

CDH2

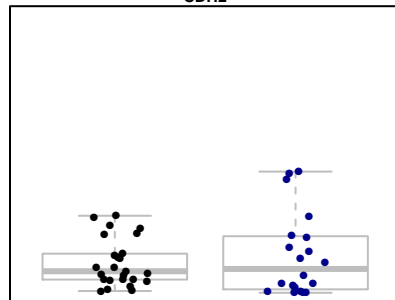

DSG2

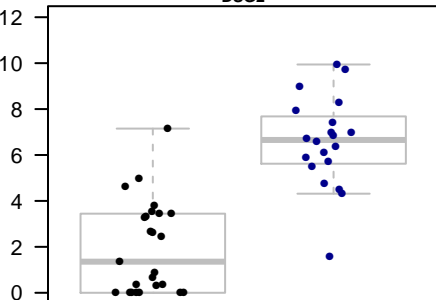

KRT8

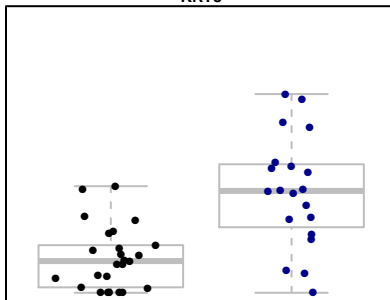

KRT18

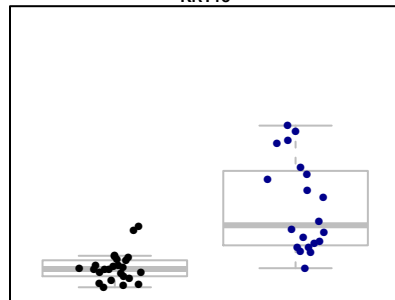

KRT19

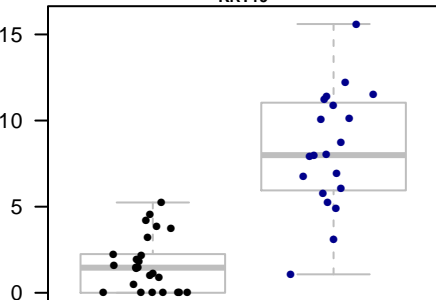

EGFR

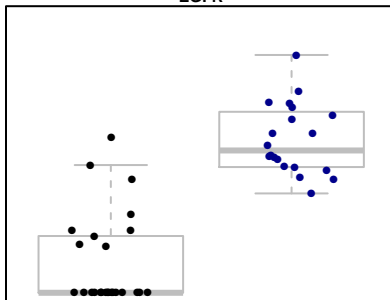

Supplement: mmc1.pdf [file mmc1.pdf]

**A**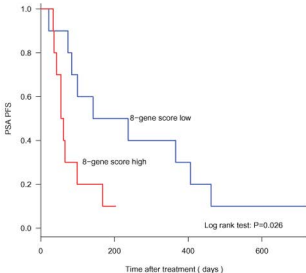**B**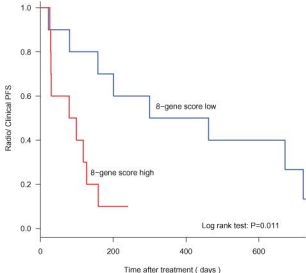

Supplement: mmc2.pdf [file mmc2.pdf]
